# Supplementary material for: Theoretical study on molecular mechanism of aerobic oxidation of 5-hydroxymethylfurfural to 2,5-diformyfuran catalyzed by VO2+ with counterpart anion in N,N-dimethylacetamide solution
Source: Royal Society of Chemistry journal article supplement (doi:10.1039/d1ra07297h), 2021-01-01
Supplement: d1ra07297h1.pdf [file d1ra07297h1.pdf]

## Electronic Supplementary Information

### Theoretical Study on Molecular Mechanism of Aerobic Oxidation of 5-Hydroxymethylfurfural to 2,5-Diformylfuran Catalyzed by $\text{VO}_2^+$ with Counterpart Anion in N,N-Dimethylacetamide Solution

Zhen-Bing Si<sup>a</sup>, Jin-Shan Xiong<sup>a</sup>, Ting Qi<sup>a</sup>, Hong-Mei Yang<sup>a</sup>, Han-Yun Min<sup>a</sup>, Hua-Qing Yang<sup>a\*</sup>, Chang-Wei Hu<sup>b</sup>

<sup>a</sup>College of Chemical Engineering, Sichuan University, Chengdu, Sichuan, 610065, P.R. China

<sup>b</sup>Key Laboratory of Green Chemistry and Technology, Ministry of Education, College of Chemistry, Sichuan University, Chengdu, Sichuan, 610064, P.R. China

\*Correspondence to:

H.-Q. Yang; e-mail: [huaqingyang@scu.edu.cn](mailto:huaqingyang@scu.edu.cn);

Fax: 86 28 85464466;

Telephone: 86 28 85464466

*RSC Advances*

# Catalog

- (1). **Figure S1:** Arrhenius plots of rate constants for the crucial reaction step of HMF +  $[\text{V}(\text{O})_2(\text{DMA})_2]^+ \rightarrow \text{O-TS2} + \text{DMA}$  in the reaction of  $2\text{HMF} + \text{O}_2 \rightarrow 2\text{DFF} + 2\text{H}_2\text{O}$  catalyzed over  $[\text{V}(\text{O})_2(\text{DMA})_2]^+$  in N,N-Dimethylacetamide (DMA) Solution. ....2
- (2). **Figure S2:** Arrhenius plots of rate constants for the crucial reaction step of HMF +  $[\text{V}(\text{O})_2(\text{DMA})_2]^+ \dots \text{Cl}^- \rightarrow \text{Cl-TS2} + \text{DMA}$  in the reaction of  $2\text{HMF} + \text{O}_2 \rightarrow 2\text{DFF} + 2\text{H}_2\text{O}$  catalyzed over  $[\text{V}(\text{O})_2(\text{DMA})_2]^+ \dots \text{Cl}^-$  in N,N-Dimethylacetamide (DMA) Solution .....3
- (3). **Table S1.** The optimized geometric structures (a) and the formed Gibbs free energies (b) ( $G_r$ ,  $\text{kJ mol}^{-1}$ ) of  $[\text{V}(\text{O})_2(\text{DMA})_2]$  and  $[\text{V}(\text{O})_2(\text{Cl})]$  complexes in the DMA solution. Bond lengths are reported in Å.....4
- (4). **Table S2.** Zero-point energies ( $ZPE$ , hartree), thermal correction to Gibbs free energy ( $G_0$ , hartree), total energies ( $E_c$ , hartree) corrected by  $ZPE$ , sum of electronic and thermal free energies ( $G_c$ , hartree) with  $ZPE$  and thermal corrections, and relative energies ( $E_r$ ,  $\text{kJ mol}^{-1}$ ) and relative Gibbs free energies ( $G_r$ ,  $\text{kJ mol}^{-1}$ ) relative to HMF-1 for eight configurations of 5-hydroxymethylfurfural (HMF) at M06/6-311++G(d,p) level in N,N-Dimethylacetamide (DMA) Solution under experimental temperature and pressure (383.0K and 1.0 atm). .....5
- (5). **Figure S3.** The geometric structures and the relative Gibbs free energy ( $\Delta G$ ,  $\text{kJ mol}^{-1}$ ) relative to HMF-1 for eight configurations of 5-hydroxymethylfurfural (HMF) at M06/6-311++G(d,p) level in N,N-dimethylacetamide (DMA) solution under ambient temperature and pressure (383 K and 1 atm). For clarity, hydrogen atoms on carbon are not shown. Bond lengths are reported in Å.....5
- (6). **Table S3.** Zero-point energies ( $ZPE$ , hartree), thermal correction to Gibbs free energy ( $G_0$ , hartree), total energies ( $E_c$ , hartree) corrected by  $ZPE$ , sum of electronic and thermal free energies ( $G_c$ , hartree) with  $ZPE$  and thermal corrections, and relative energies ( $E_r$ ,  $\text{kJ mol}^{-1}$ ) and relative Gibbs free energies ( $G_r$ ,  $\text{kJ mol}^{-1}$ ) relative to DFF-1 for three configurations of 2,5-Diformylfuran (DFF) at M06/6-311++G(d,p) level in N,N-Dimethylacetamide (DMA) Solution under experimental temperature and pressure (383.0K and 1.0 atm). .....6
- (7). **Figure S4.** The geometric structures and the relative Gibbs free energy ( $\Delta G$ ,  $\text{kJ mol}^{-1}$ ) relative to DFF-1 for three configurations of 2,5-diformylfuran (DFF) at M06/6-311++G(d,p) level in N,N-dimethylacetamide (DMA) solution under ambient temperature and pressure (383 K and 1 atm). For clarity, hydrogen atoms on carbon are not shown. Bond lengths are reported in Å. ....6
- (8). **Figure S5:** The geometric structures (a) and the schematic energy diagrams (b) with the relative Gibbs free energy ( $G_r$ ,  $\text{kJ mol}^{-1}$ ) relative to the reactants for the first HMF oxidation

to DFF catalyzed by  $[V(O)_2(DMA)_2]^+$  without/with  $Cl^-$  in the DMA solution. For clarity, the hydrogen atoms on carbon are not shown. Bond lengths are reported in Å. ....7

(9). **Figure S6:** The geometric structures (a) and the schematic energy diagrams (b) with the relative Gibbs free energy ( $G_r$ ,  $kJ\ mol^{-1}$ ) relative to the reactants for the oxidative dehydration of the second HMF to DFF by  $[V(O)_3(DMA)]^+$  without/with  $Cl^-$  in the DMA solution. For clarity, the hydrogen atoms on carbon are not shown. Bond lengths are reported in Å.....8

(10). **Table S4.** Zero-point energies ( $ZPE$ , hartree), thermal correction to Gibbs free energy ( $G_0$ , hartree), total energies ( $E_c$ , hartree) corrected by  $ZPE$ , sum of electronic and thermal free energies ( $G_c$ , hartree) with  $ZPE$  and thermal corrections, and relative energies ( $E_r$ ,  $kJ\ mol^{-1}$ ) and relative Gibbs free energies ( $G_r$ ,  $kJ\ mol^{-1}$ ) of various species with respect to the reactants for the conversion of 5-hydroxymethylfurfural (HMF) to 2,5-Diformylfuran (DFF) ( $2HMF + O_2 \rightarrow 2DFF + 2H_2O$ ) catalyzed over  $[V(O)_2(DMA)_2]^+$  at M06/6-311++G(d,p)/aug-cc-pVTZ level in N,N-Dimethylacetamide (DMA) Solution under experimental temperature and pressure (383.0K and 1.0 atm).....9

(11). **Table S5.** Zero-point energies ( $ZPE$ , hartree), thermal correction to Gibbs free energy ( $G_0$ , hartree), total energies ( $E_c$ , hartree) corrected by  $ZPE$ , sum of electronic and thermal free energies ( $G_c$ , hartree) with  $ZPE$  and thermal corrections, and relative energies ( $E_r$ ,  $kJ\ mol^{-1}$ ) and relative Gibbs free energies ( $G_r$ ,  $kJ\ mol^{-1}$ ) of various species with respect to the reactants for the conversion of 5-hydroxymethylfurfural (HMF) to 2,5-Diformylfuran (DFF) ( $2HMF + O_2 \rightarrow 2DFF + 2H_2O$ ) catalyzed over  $[V(O)_2(DMA)_2]^+ \dots Cl^-$  at M06/6-311++G(d,p)/aug-cc-pVTZ level in N,N-Dimethylacetamide (DMA) Solution under experimental temperature and pressure (383.0K and 1.0 atm).....12

## NOTES: Evaluation of rate constants:

The rate constants  $k(T)$  were evaluated according to conventional transition state theory  $k'(T)$ , including the tunneling correction  $\kappa(T)$  based on Wigner's formulation as follows:<sup>1</sup>

$$k' = \frac{k_B T}{h c^0} \cdot e^{-\frac{\Delta G^\ddagger}{RT}}$$

$$\kappa(T) = 1 + \frac{1}{24} \left| \frac{\omega^\ddagger h}{k_B T} \right|^2$$

$$k = \kappa(T) \times k'$$

$$\ln k = -\frac{E_a}{RT} + \ln A$$

$$k = A \cdot e^{-\frac{E_a}{RT}}$$

where  $k_B$  is Boltzmann's constant,  $T$  is the absolute temperature,  $h$  is Planck's constant,  $c^0$  is the standard concentration ( $1 \text{ mol dm}^{-3}$ ),  $\Delta G^\ddagger$  is the activation Gibbs free energy barrier and  $\omega^\ddagger$  is the imaginary frequency of the TS.

## References:

1. E. Wigner, *J. Chem. Phys.*, 1937, **5**, 720–723.

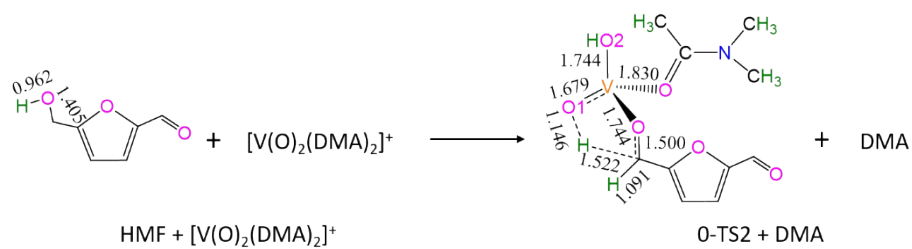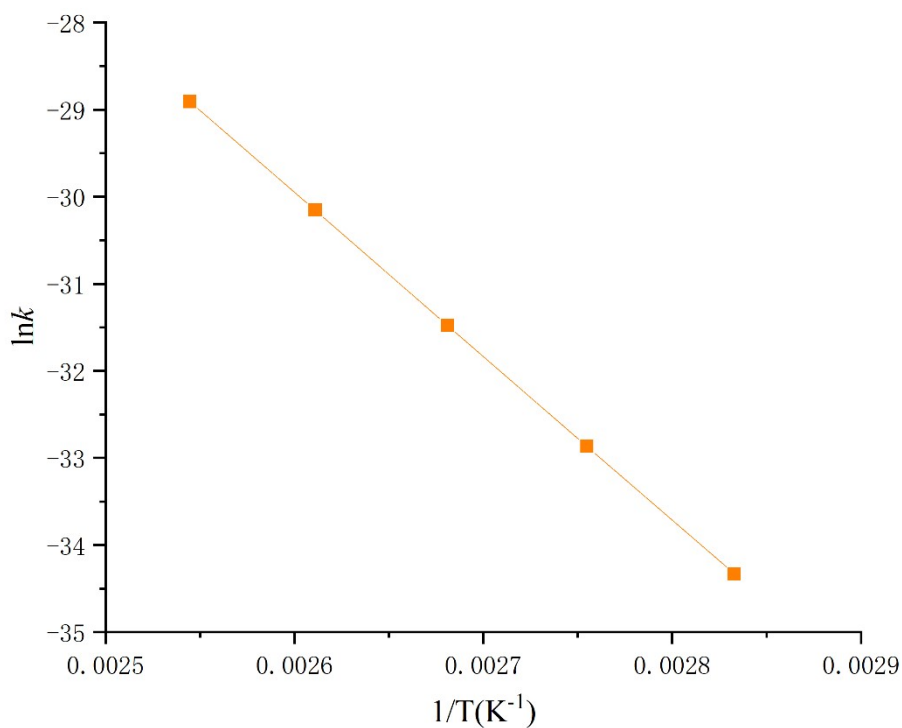

$$k = 1.45 \times 10^8 \exp(-155946/RT)$$

**Figure S1:** Arrhenius plots of rate constants for the crucial reaction step of  $\text{HMF} + [\text{V}(\text{O})_2(\text{DMA})_2]^+ \rightarrow \text{0-TS2} + \text{DMA}$  in the reaction of  $2\text{HMF} + \text{O}_2 \rightarrow 2\text{DFF} + 2\text{H}_2\text{O}$  catalyzed over  $[\text{V}(\text{O})_2(\text{DMA})_2]^+$  in N,N-Dimethylacetamide (DMA) Solution.

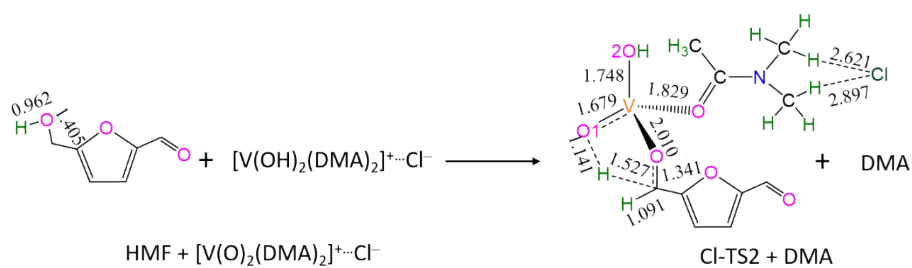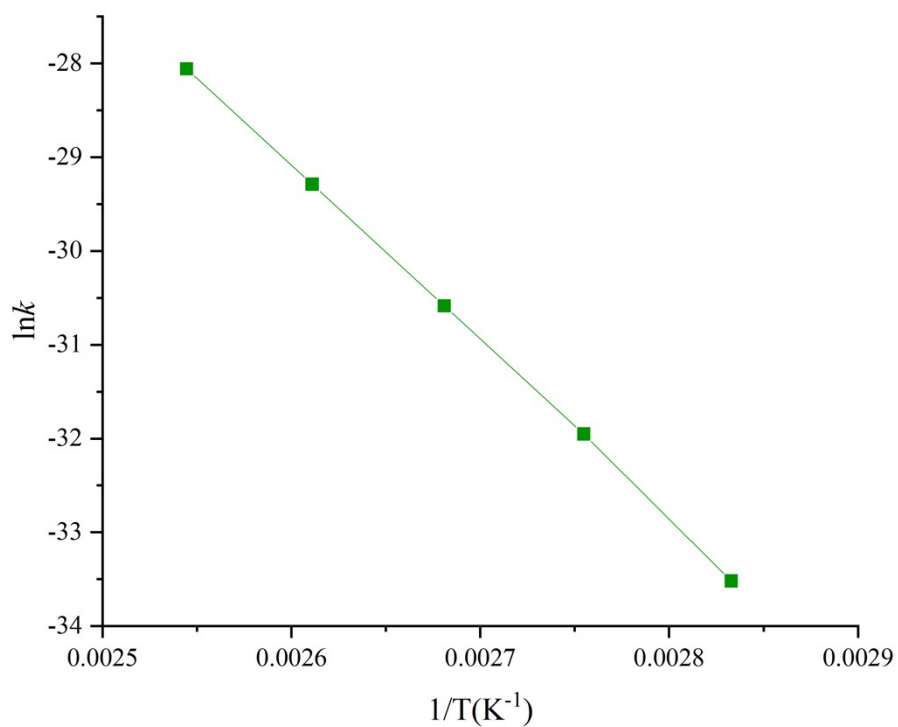

$$k = 2.74 \times 10^8 \exp(-155189/RT)$$

**Figure S2:** Arrhenius plots of rate constants for the crucial reaction step of  $\text{HMF} + [\text{V}(\text{O})_2(\text{DMA})_2]^+\cdots\text{Cl}^- \rightarrow \text{Cl}^- \text{TS2} + \text{DMA}$  in the reaction of  $2\text{HMF} + \text{O}_2 \rightarrow 2\text{DFF} + 2\text{H}_2\text{O}$  catalyzed over  $[\text{V}(\text{O})_2(\text{DMA})_2]^+\cdots\text{Cl}^-$  in N,N-Dimethylacetamide (DMA) Solution

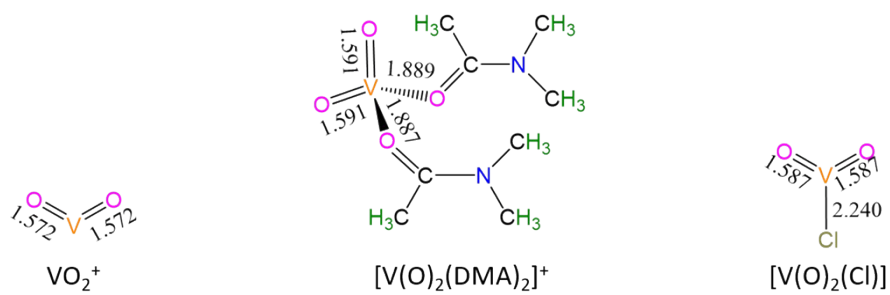

| Reaction                                                                                | $\Delta G(\text{kJ/mol})$ |
|-----------------------------------------------------------------------------------------|---------------------------|
| $\text{VO}_2^+ + 2 \cdot \text{DMA} \rightarrow [\text{V}(\text{O})_2(\text{DMA})_2]^+$ | -164.0                    |
| $\text{VO}_2^+ + \text{Cl}^- \rightarrow [\text{V}(\text{O})_2(\text{Cl})]$             | -147.8                    |

(b)

**Table S1.** The optimized geometric structures (a) and the formed Gibbs free energies (b) (Gr, kJ mol<sup>-1</sup>) of [V(O)<sub>2</sub>(DMA)<sub>2</sub>]<sup>+</sup> and [V(O)<sub>2</sub>(Cl)] complexes in the DMA solution. Bond lengths are reported in Å.

**Table S2.** Zero-point energies ( $ZPE$ , hartree), thermal correction to Gibbs free energy ( $G_0$ , hartree), total energies ( $E_c$ , hartree) corrected by  $ZPE$ , sum of electronic and thermal free energies ( $G_c$ , hartree) with  $ZPE$  and thermal corrections, and relative energies ( $E_r$ ,  $\text{kJ mol}^{-1}$ ) and relative Gibbs free energies ( $G_r$ ,  $\text{kJ mol}^{-1}$ ) relative to HMF-1 for eight configurations of 5-hydroxymethylfurfural (HMF) at M06/6-311++G(d,p) level in N,N-Dimethylacetamide (DMA) Solution under experimental temperature and pressure (383.0K and 1.0 atm).

| Species | $ZPE$   | $E_c$      | $G_0$   | $G_c$      | $E_r$ | $G_r$ |
|---------|---------|------------|---------|------------|-------|-------|
| HMF-1   | 0.11135 | -457.63672 | 0.06464 | -457.68343 | 0.0   | 0.0   |
| HMF-2   | 0.11175 | -457.63677 | 0.06516 | -457.68336 | -0.1  | 0.2   |
| HMF-3   | 0.11162 | -457.63616 | 0.06501 | -457.68277 | 1.5   | 1.7   |
| HMF-4   | 0.11158 | -457.63554 | 0.06508 | -457.68203 | 3.1   | 3.7   |
| HMF-5   | 0.11152 | -457.63497 | 0.06489 | -457.68160 | 4.6   | 4.8   |
| HMF-6   | 0.11195 | -457.63655 | 0.06605 | -457.68245 | 0.4   | 2.6   |
| HMF-7   | 0.11077 | -457.63582 | 0.06572 | -457.68087 | 2.4   | 6.7   |
| HMF-8   | 0.11163 | -457.63542 | 0.06512 | -457.68192 | 3.4   | 4.0   |

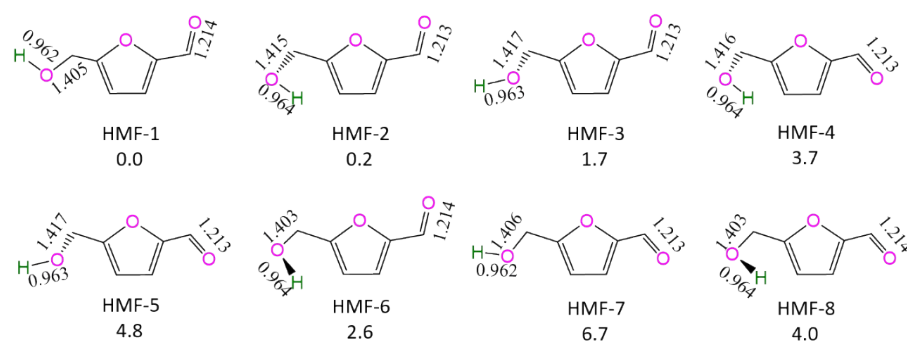

**Figure S3.** The geometric structures and the relative Gibbs free energy ( $\Delta G$ ,  $\text{kJ mol}^{-1}$ ) relative to HMF-1 for eight configurations of 5-hydroxymethylfurfural (HMF) at M06/6-311++G(d,p) level in N,N-dimethylacetamide (DMA) solution under ambient temperature and pressure (383 K and 1 atm). For clarity, hydrogen atoms on carbon are not shown. Bond lengths are reported in Å.



**Table S3.** Zero-point energies (*ZPE*, hartree), thermal correction to Gibbs free energy ( $G_0$ , hartree), total energies ( $E_c$ , hartree) corrected by *ZPE*, sum of electronic and thermal free energies ( $G_c$ , hartree) with *ZPE* and thermal corrections, and relative energies ( $E_r$ , kJ mol<sup>-1</sup>) and relative Gibbs free energies ( $G_r$ , kJ mol<sup>-1</sup>) relative to DFF-1 for three configurations of 2,5-Diformylfuran (DFF) at M06/6-311++G(d,p) level in N,N-Dimethylacetamide (DMA) Solution under experimental temperature and pressure (383.0K and 1.0 atm).

| Species | <i>ZPE</i> | $E_c$      | $G_0$   | $G_c$      | $E_r$ | $G_r$ |
|---------|------------|------------|---------|------------|-------|-------|
| DFF-1   | 0.08823    | -456.45115 | 0.04344 | -456.49594 | 0.0   | 0.0   |
| DFF-2   | 0.08878    | -456.45252 | 0.04399 | -456.49731 | -3.6  | -3.6  |
| DFF-3   | 0.08840    | -456.45200 | 0.04345 | -456.49694 | -2.2  | -2.4  |

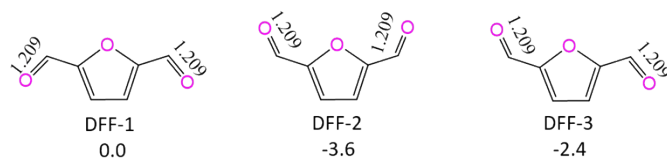

**Figure S4.** The geometric structures and the relative Gibbs free energy ( $\Delta G$ , kJ mol<sup>-1</sup>) relative to DFF-1 for three configurations of 2,5-diformylfuran (DFF) at M06/6-311++G(d,p) level in N,N-dimethylacetamide (DMA) solution under ambient temperature and pressure (383 K and 1 atm). For clarity, hydrogen atoms on carbon are not shown. Bond lengths are reported in Å.

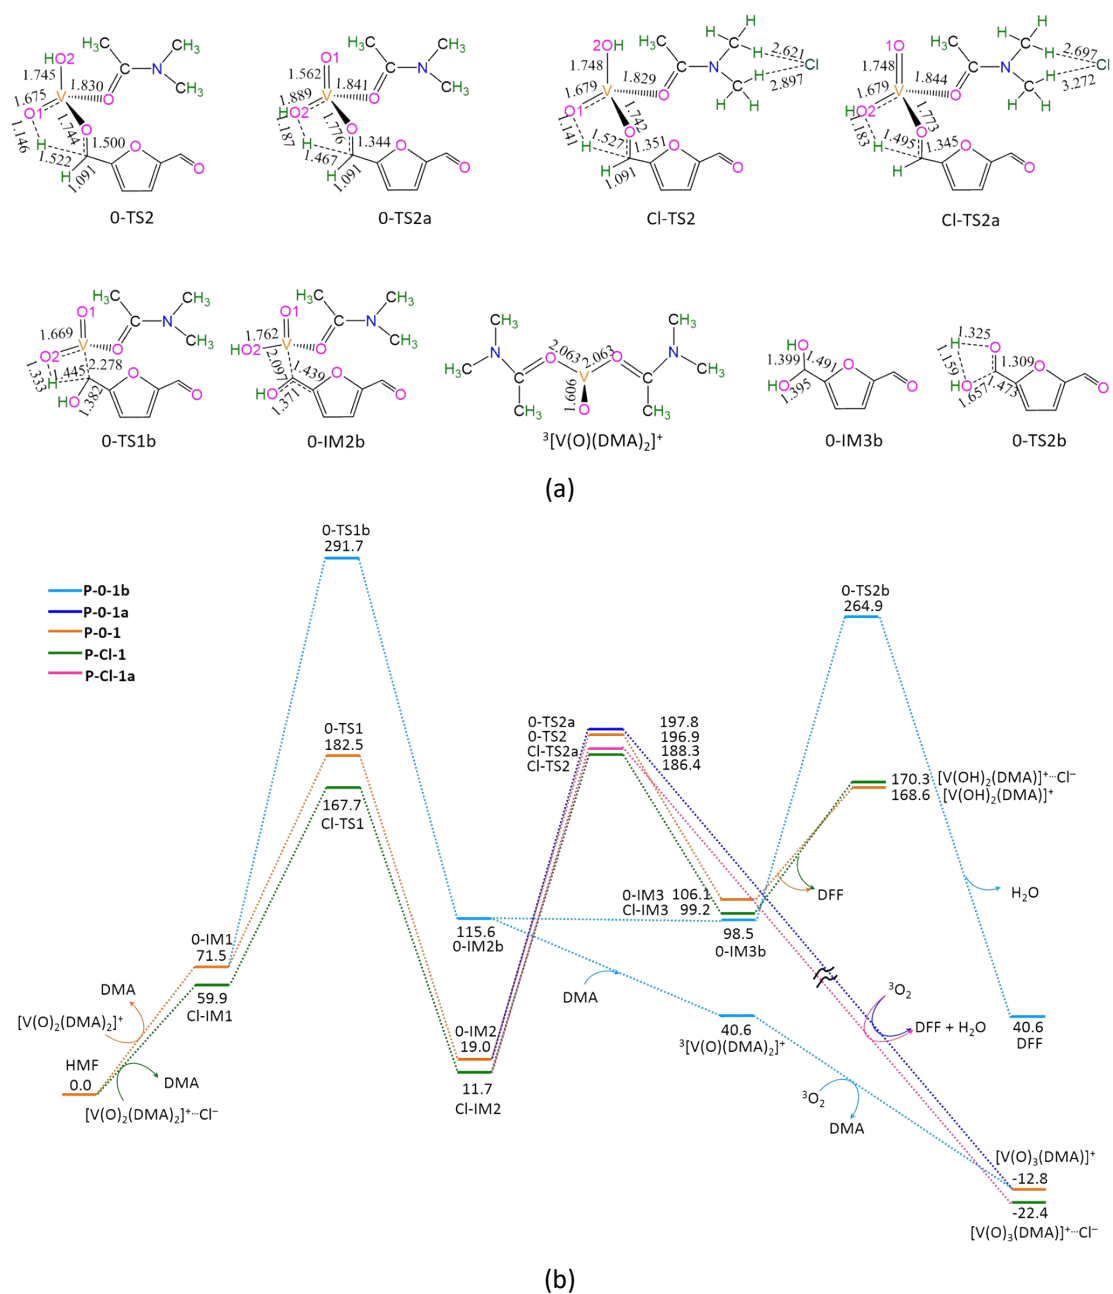

**Figure S5:** The geometric structures (a) and the schematic energy diagrams (b) with the relative Gibbs free energy ( $G_r$ , kJ mol<sup>-1</sup>) relative to the reactants for the first HMF oxidation to DFF catalyzed by  $[V(O)_2(DMA)_2]^+$  without/with  $Cl^-$  in the DMA solution. For clarity, the hydrogen atoms on carbon are not shown. Bond lengths are reported in Å.

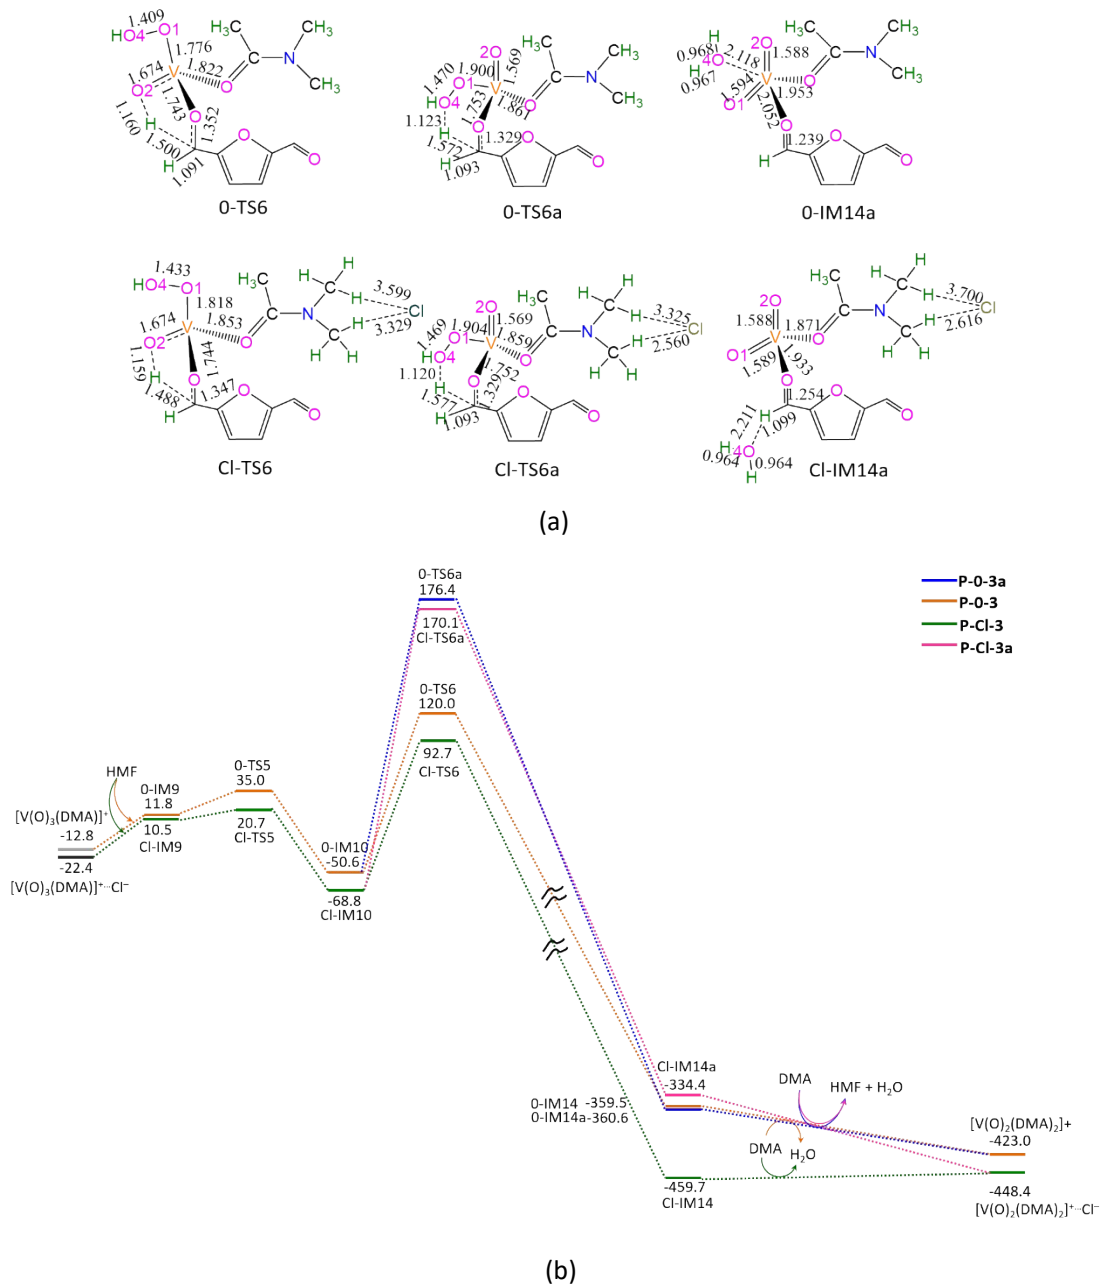

**Figure S6:** The geometric structures (a) and the schematic energy diagrams (b) with the relative Gibbs free energy ( $G_r$ ,  $\text{kJ mol}^{-1}$ ) relative to the reactants for the oxidative dehydration of the second HMF to DFF by  $[\text{V}(\text{O})_3(\text{DMA})]^+$  without/with  $\text{Cl}^-$  in the DMA solution. For clarity, the hydrogen atoms on carbon are not shown. Bond lengths are reported in Å

**Table S4.** Zero-point energies ( $ZPE$ , hartree), thermal correction to Gibbs free energy ( $G_0$ , hartree), total energies ( $E_c$ , hartree) corrected by  $ZPE$ , sum of electronic and thermal free energies ( $G_c$ , hartree) with  $ZPE$  and thermal corrections, and relative energies ( $E_r$ ,  $\text{kJ mol}^{-1}$ ) and relative Gibbs free energies ( $G_r$ ,  $\text{kJ mol}^{-1}$ ) of various species with respect to the reactants for the conversion of 5-hydroxymethylfurfural (HMF) to 2,5-Diformylfuran (DFF) ( $2\text{HMF} + \text{O}_2 \rightarrow 2\text{DFF} + 2\text{H}_2\text{O}$ ) catalyzed over  $[\text{V}(\text{O})_2(\text{DMA})_2]^+$  at M06/6-311++G(d,p)/aug-cc-pVTZ level in N,N-Dimethylacetamide (DMA) Solution under experimental temperature and pressure (383.0K and 1.0 atm).

| Species                                                                                                | $ZPE$   | $E_c$       | $G_0$    | $G_c$       | $E_r$ | $G_r$ |
|--------------------------------------------------------------------------------------------------------|---------|-------------|----------|-------------|-------|-------|
| DMA                                                                                                    | 0.12859 | -287.59794  | 0.08445  | -287.64208  |       |       |
| $^3\text{O}_2$                                                                                         | 0.00387 | -150.29864  | -0.02282 | -150.32533  |       |       |
| $\text{H}_2\text{O}$                                                                                   | 0.02126 | -76.40546   | -0.00263 | -76.42935   |       |       |
| HMF-1 + $[\text{V}(\text{O})_2(\text{DMA})_2]^+$                                                       | 0.38142 | -2127.25036 | 0.26073  | -2127.37105 | 0.0   | 0.0   |
| 0-IM1                                                                                                  | 0.25388 | -1839.63144 | 0.18361  | -1839.70171 |       |       |
| 0-IM1 + DMA                                                                                            | 0.38247 | -2127.22939 | 0.26806  | -2127.34380 | 55.1  | 71.6  |
| 0-TS1                                                                                                  | 0.24949 | -1839.59343 | 0.18346  | -1839.65946 |       |       |
| 0-TS1 + DMA                                                                                            | 0.37808 | -2127.19137 | 0.26791  | -2127.30154 | 154.9 | 182.5 |
| 0-IM2                                                                                                  | 0.25318 | -1839.65348 | 0.18496  | -1839.72171 |       |       |
| 0-IM2 + DMA                                                                                            | 0.38177 | -2127.25143 | 0.26941  | -2127.36379 | -2.8  | 19.1  |
| 0-TS2                                                                                                  | 0.24795 | -1839.58740 | 0.18140  | -1839.65395 |       |       |
| 0-TS2 + DMA                                                                                            | 0.37654 | -2127.18535 | 0.26585  | -2127.29603 | 170.7 | 197.0 |
| 0-TS2a                                                                                                 | 0.24816 | -1839.58675 | 0.18130  | -1839.65362 |       |       |
| 0-TS2a + DMA                                                                                           | 0.37675 | -2127.18470 | 0.26575  | -2127.29570 | 172.4 | 197.8 |
| 0-IM3                                                                                                  | 0.25062 | -1839.61790 | 0.17997  | -1839.68855 |       |       |
| 0-IM3 + DMA                                                                                            | 0.37921 | -2127.21585 | 0.26442  | -2127.33064 | 90.6  | 106.1 |
| $[\text{V}(\text{OH})_2(\text{DMA})]^+$                                                                | 0.15621 | -1383.11153 | 0.10030  | -1383.16744 |       |       |
| $[\text{V}(\text{OH})_2(\text{DMA})]^+ + \text{DMA} + \text{DFF-2}$                                    | 0.37358 | -2127.16199 | 0.22874  | -2127.30683 | 232.0 | 168.6 |
| 0-IM5                                                                                                  | 0.16469 | -1533.51321 | 0.10545  | -1533.57246 |       |       |
| 0-IM5 + DMA + DFF-2 - $^3\text{O}_2$                                                                   | 0.37820 | -2127.26503 | 0.25671  | -2127.38652 | -38.5 | -40.6 |
| $^3\text{O-IM5}$                                                                                       | 0.16387 | -1533.48600 | 0.10042  | -1533.54946 |       |       |
| $^3\text{O-IM5} + \text{DMA} + \text{DFF-2} - ^3\text{O}_2$                                            | 0.37738 | -2127.23782 | 0.25168  | -2127.36351 | 32.9  | 19.8  |
| 0-TS3                                                                                                  | 0.16163 | -1533.46586 | 0.10258  | -1533.52491 |       |       |
| 0-TS3 + DMA + DFF-2 - $^3\text{O}_2$                                                                   | 0.37513 | -2127.21768 | 0.25384  | -2127.33897 | 85.8  | 84.2  |
| 0-IM6                                                                                                  | 0.16643 | -1533.51228 | 0.10643  | -1533.57229 |       |       |
| 0-IM6 + DMA + DFF-2 - $^3\text{O}_2$                                                                   | 0.37993 | -2127.26410 | 0.25769  | -2127.38634 | -36.1 | -40.2 |
| 0-TS4                                                                                                  | 0.16456 | -1533.46841 | 0.10474  | -1533.52823 |       |       |
| 0-TS4 + DMA + DFF-2 - $^3\text{O}_2$                                                                   | 0.37806 | -2127.22023 | 0.25600  | -2127.34229 | 79.1  | 75.5  |
| 0-IM7                                                                                                  | 0.16671 | -1533.48652 | 0.10609  | -1533.54715 |       |       |
| 0-IM7 + DMA + DFF-2 - $^3\text{O}_2$                                                                   | 0.38021 | -2127.23834 | 0.25735  | -2127.36120 | 31.6  | 25.9  |
| $[\text{V}(\text{O})_3(\text{DMA})]^+$                                                                 | 0.14275 | -1457.07992 | 0.09016  | -1457.13251 |       |       |
| $[\text{V}(\text{O})_3(\text{DMA})]^+ + \text{DMA} + \text{DFF-2} + \text{H}_2\text{O} - ^3\text{O}_2$ | 0.37751 | -2127.23720 | 0.23880  | -2127.37591 | 34.6  | -12.8 |

Continued from Table S4

| Species                                                                                                                      | ZPE     | $E_c$       | $G_0$   | $G_c$       | $E_r$  | $G_r$  |
|------------------------------------------------------------------------------------------------------------------------------|---------|-------------|---------|-------------|--------|--------|
| 0-IM9                                                                                                                        | 0.25658 | -1914.73542 | 0.18541 | -1914.80658 |        |        |
| 0-IM9 + DMA + DFF-2<br>+ H <sub>2</sub> O - HMF-1 - <sup>3</sup> O <sub>2</sub>                                              | 0.37999 | -2127.25598 | 0.26941 | -2127.36656 | -14.8  | 11.8   |
| 0-TS5                                                                                                                        | 0.25284 | -1914.72806 | 0.18318 | -1914.79773 |        |        |
| 0-TS5 + DMA - <sup>3</sup> O <sub>2</sub> + DFF-2<br>+ H <sub>2</sub> O - HMF-1                                              | 0.37625 | -2127.24863 | 0.26718 | -2127.35770 | 4.5    | 35.1   |
| 0-IM10                                                                                                                       | 0.25745 | -1914.75900 | 0.18610 | -1914.83035 |        |        |
| 0-IM10 + DMA - <sup>3</sup> O <sub>2</sub> + DFF-2<br>+ H <sub>2</sub> O - HMF-1                                             | 0.38086 | -2127.27957 | 0.27010 | -2127.39033 | -76.7  | -50.6  |
| 0-TS6                                                                                                                        | 0.25140 | -1914.69424 | 0.18027 | -1914.76537 |        |        |
| 0-TS6 + DMA - <sup>3</sup> O <sub>2</sub> + DFF-2<br>+ H <sub>2</sub> O - HMF-1                                              | 0.37481 | -2127.21481 | 0.26427 | -2127.32535 | 93.3   | 120.0  |
| 0-IM11                                                                                                                       | 0.25537 | -1914.73711 | 0.18335 | -1914.80913 |        |        |
| 0-IM11 + DMA - <sup>3</sup> O <sub>2</sub> + DFF-2<br>+ H <sub>2</sub> O - HMF-1                                             | 0.37878 | -2127.25767 | 0.26735 | -2127.36910 | -19.2  | 5.1    |
| [V(OH)(OOH)(DMA)] <sup>+</sup>                                                                                               | 0.16081 | -1458.23466 | 0.10296 | -1458.29251 |        |        |
| [V(OH)(OOH)(DMA)] <sup>+</sup> + DMA<br>+ H <sub>2</sub> O - HMF-1 - <sup>3</sup> O <sub>2</sub> + 2*DFF-2                   | 0.37301 | -2127.20774 | 0.23095 | -2127.34979 | 111.9  | 55.8   |
| 0-IM13                                                                                                                       | 0.16201 | -1458.40709 | 0.10364 | -1458.46546 |        |        |
| 0-IM13 + DMA - <sup>3</sup> O <sub>2</sub> + 2*DFF-2<br>+ H <sub>2</sub> O - HMF-1                                           | 0.37421 | -2127.38017 | 0.23164 | -2127.52275 | -340.8 | -398.3 |
| 0-TS7                                                                                                                        | 0.15918 | -1458.34169 | 0.10304 | -1458.39783 |        |        |
| 0-TS7 + DMA - <sup>3</sup> O <sub>2</sub> + 2*DFF-2<br>+ H <sub>2</sub> O - HMF-1                                            | 0.37137 | -2127.31477 | 0.23103 | -2127.45511 | -169.1 | -220.7 |
| 0-IM14                                                                                                                       | 0.16266 | -1458.39129 | 0.10324 | -1458.45070 |        |        |
| 0-IM14 + DMA - <sup>3</sup> O <sub>2</sub> + 2*DFF-2<br>+ H <sub>2</sub> O - HMF-1                                           | 0.37485 | -2127.36437 | 0.23123 | -2127.50798 | -299.3 | -359.5 |
| 0-TS6a                                                                                                                       | 0.24911 | -1914.66720 | 0.17243 | -1914.74388 |        |        |
| 0-TS6a + DMA - <sup>3</sup> O <sub>2</sub> + 2*DFF-2<br>+ H <sub>2</sub> O - HMF-1                                           | 0.37252 | -2127.18777 | 0.25643 | -2127.30386 | 164.3  | 176.4  |
| 0-IM14a                                                                                                                      | 0.25427 | -1914.87033 | 0.17619 | -1914.94841 |        |        |
| 0-IM14a + DMA - <sup>3</sup> O <sub>2</sub> + 2*DFF-2<br>+ H <sub>2</sub> O - HMF-1                                          | 0.37768 | -2127.39090 | 0.26019 | -2127.50838 | -369.0 | -360.6 |
| [V(O) <sub>2</sub> (DMA) <sub>2</sub> ] <sup>+</sup>                                                                         | 0.27007 | -1669.61364 | 0.19609 | -1669.68761 |        |        |
| [V(O) <sub>2</sub> (DMA) <sub>2</sub> ] <sup>+</sup> - <sup>3</sup> O <sub>2</sub> + 2*DFF-2<br>- HMF-1 + 2*H <sub>2</sub> O | 0.37493 | -2127.39424 | 0.23701 | -2127.53216 | -377.8 | -423.0 |

Continued from **Table S4**

|                                               |         |             |         |             |       |       |
|-----------------------------------------------|---------|-------------|---------|-------------|-------|-------|
| [VO(DMA) <sub>2</sub> ] <sup>+</sup>          | 0.26542 | -1594.35696 | 0.19346 | -1594.42892 |       |       |
| 0-TS1c                                        | 0.24823 | -1839.54952 | 0.17989 | -1839.61786 |       |       |
| 0-TS1c + DMA                                  | 0.37682 | -2127.14746 | 0.26434 | -2127.25995 | 270.1 | 291.7 |
| 0-IM2c                                        | 0.25110 | -1839.61463 | 0.18079 | -1839.68494 |       |       |
| 0-IM2c + DMA                                  | 0.37969 | -2127.21258 | 0.26525 | -2127.32702 | 99.2  | 115.6 |
| 0-IM3c                                        | 0.11635 | -532.85603  | 0.06778 | -532.90460  |       |       |
| 0-IM3c + [VO(DMA) <sub>2</sub> ] <sup>+</sup> | 0.38177 | -2127.21298 | 0.26123 | -2127.33352 | 98.1  | 98.5  |
| 0-TS3c                                        | 0.11045 | -532.79316  | 0.06239 | -532.84123  |       |       |
| 0-TS3c + [VO(DMA) <sub>2</sub> ] <sup>+</sup> | 0.37587 | -2127.15012 | 0.25584 | -2127.27015 | 263.2 | 264.9 |

**Table S5.** Zero-point energies ( $ZPE$ , hartree), thermal correction to Gibbs free energy ( $G_0$ , hartree), total energies ( $E_c$ , hartree) corrected by  $ZPE$ , sum of electronic and thermal free energies ( $G_c$ , hartree) with  $ZPE$  and thermal corrections, and relative energies ( $E_r$ ,  $\text{kJ mol}^{-1}$ ) and relative Gibbs free energies ( $G_r$ ,  $\text{kJ mol}^{-1}$ ) of various species with respect to the reactants for the conversion of 5-hydroxymethylfurfural (HMF) to 2,5-Diformylfuran (DFF) ( $2\text{HMF} + \text{O}_2 \rightarrow 2\text{DFF} + 2\text{H}_2\text{O}$ ) catalyzed over  $[\text{V}(\text{O})_2(\text{DMA})_2]^+ \dots \text{Cl}^-$  at M06/6-311++G(d,p)/aug-cc-pVTZ level in N,N-Dimethylacetamide (DMA) Solution under experimental temperature and pressure (383.0K and 1.0 atm).

| Species                                                                                                                  | $ZPE$   | $E_c$       | $G_0$    | $G_c$       | $E_r$ | $G_r$ |
|--------------------------------------------------------------------------------------------------------------------------|---------|-------------|----------|-------------|-------|-------|
| $[\text{V}(\text{O})_2(\text{DMA})_2]^+ \dots \text{Cl}^-$                                                               | 0.26998 | -2129.98487 | 0.18959  | -2130.06526 |       |       |
| $\text{Cl}^-$                                                                                                            | 0.00000 | -460.36727  | -0.02006 | -460.38733  |       |       |
| HMF-1 + $[\text{V}(\text{O})_2(\text{DMA})_2]^+ \dots \text{Cl}^-$                                                       | 0.38133 | -2587.62159 | 0.25423  | -2587.74869 | 0.0   | 0.0   |
| CI-IM1                                                                                                                   | 0.25388 | -2300.00729 | 0.17737  | -2300.08380 |       |       |
| CI-IM1 + DMA                                                                                                             | 0.38247 | -2587.60523 | 0.26182  | -2587.72589 | 43.0  | 59.9  |
| CI-TS1                                                                                                                   | 0.24964 | -2299.96946 | 0.17637  | -2300.04273 |       |       |
| CI-TS1 + DMA                                                                                                             | 0.37823 | -2587.56741 | 0.26082  | -2587.68481 | 142.3 | 167.7 |
| CI-IM2                                                                                                                   | 0.25392 | -2300.02836 | 0.18014  | -2300.10214 |       |       |
| CI-IM2 + DMA                                                                                                             | 0.38251 | -2587.62631 | 0.26460  | -2587.74423 | -12.4 | 11.7  |
| CI-TS2                                                                                                                   | 0.24819 | -2299.96288 | 0.17547  | -2300.03561 |       |       |
| CI-TS2 + DMA                                                                                                             | 0.37678 | -2587.56083 | 0.25992  | -2587.67769 | 159.5 | 186.4 |
| CI-TS2a                                                                                                                  | 0.24831 | -2299.96125 | 0.17466  | -2300.03490 |       |       |
| CI-TS2a + DMA                                                                                                            | 0.37690 | -2587.55920 | 0.25911  | -2587.67698 | 163.8 | 188.3 |
| CI-IM3                                                                                                                   | 0.25159 | -2299.99360 | 0.17635  | -2300.06883 |       |       |
| CI-IM3 + DMA                                                                                                             | 0.38018 | -2587.59154 | 0.26080  | -2587.71092 | 78.9  | 99.2  |
| $[\text{V}(\text{OH})_2(\text{DMA})]^+ \dots \text{Cl}^-$                                                                | 0.15573 | -1843.48319 | 0.09449  | -1843.54443 |       |       |
| $[\text{V}(\text{OH})_2(\text{DMA})]^+ \dots \text{Cl}^- + \text{DMA} + \text{DFF-2}$                                    | 0.37311 | -2587.53365 | 0.22294  | -2587.68382 | 230.9 | 170.3 |
| CI-IM5                                                                                                                   | 0.16521 | -1993.88889 | 0.09769  | -1993.95641 |       |       |
| CI-IM5 + DMA + DFF-2 - $^3\text{O}_2$                                                                                    | 0.37872 | -2587.64071 | 0.24895  | -2587.77047 | -50.2 | -57.2 |
| CI-TS3                                                                                                                   | 0.16282 | -1993.83765 | 0.09683  | -1993.90365 |       |       |
| CI-TS3 + DMA + DFF-2 - $^3\text{O}_2$                                                                                    | 0.37633 | -2587.58947 | 0.24809  | -2587.71770 | 84.3  | 81.4  |
| CI-IM6                                                                                                                   | 0.16713 | -1993.88346 | 0.09982  | -1993.95077 |       |       |
| CI-IM6 + DMA + DFF-2 - $^3\text{O}_2$                                                                                    | 0.38064 | -2587.63528 | 0.25108  | -2587.76483 | -35.9 | -42.4 |
| CI-TS4                                                                                                                   | 0.16562 | -1993.83942 | 0.09974  | -1993.90530 |       |       |
| CI-TS4 + DMA + DFF-2 - $^3\text{O}_2$                                                                                    | 0.37913 | -2587.59124 | 0.25101  | -2587.71936 | 79.7  | 77.0  |
| CI-IM7                                                                                                                   | 0.16801 | -1993.86101 | 0.10181  | -1993.92721 |       |       |
| CI-IM7 + DMA + DFF-2 - $^3\text{O}_2$                                                                                    | 0.38151 | -2587.61283 | 0.25307  | -2587.74127 | 23.0  | 19.5  |
| $[\text{V}(\text{O})_3(\text{DMA})]^+ \dots \text{Cl}^-$                                                                 | 0.14260 | -1917.45184 | 0.08063  | -1917.51381 |       |       |
| $[\text{V}(\text{O})_3(\text{DMA})]^+ \dots \text{Cl}^- + \text{DFF-2} + \text{H}_2\text{O} - ^3\text{O}_2 + \text{DMA}$ | 0.37736 | -2587.60912 | 0.22926  | -2587.75722 | 32.7  | -22.4 |
| CI-IM9                                                                                                                   | 0.25622 | -2375.10752 | 0.17902  | -2375.18472 |       |       |
| CI-IM9 + DMA + DFF-2 + $\text{H}_2\text{O} - \text{HMF-1} - ^3\text{O}_2$                                                | 0.37963 | -2587.62809 | 0.26302  | -2587.74469 | -17.1 | 10.5  |

Continued from Table S5

| Species                                                                                                                     | ZPE     | $E_c$       | $G_0$   | $G_c$       | $E_r$  | $G_r$  |
|-----------------------------------------------------------------------------------------------------------------------------|---------|-------------|---------|-------------|--------|--------|
| Cl-TS5                                                                                                                      | 0.25292 | -2375.10360 | 0.17558 | -2375.18094 |        |        |
| Cl-TS5 + DMA - $^3O_2$ + DFF-2 + H <sub>2</sub> O<br>- HMF-1                                                                | 0.37633 | -2587.62417 | 0.25958 | -2587.74091 | -6.8   | 20.4   |
| Cl-IM10                                                                                                                     | 0.25717 | -2375.13445 | 0.17671 | -2375.21492 |        |        |
| Cl-IM10 + DMA - $^3O_2$ + DFF-2<br>+ H <sub>2</sub> O - HMF-1                                                               | 0.38058 | -2587.65502 | 0.26071 | -2587.77489 | -87.8  | -68.8  |
| Cl-TS6                                                                                                                      | 0.25280 | -2375.07684 | 0.17699 | -2375.15265 |        |        |
| Cl-TS6 + DMA - $^3O_2$ + DFF-2<br>+ H <sub>2</sub> O - HMF-1                                                                | 0.37621 | -2587.59741 | 0.26099 | -2587.71262 | 63.5   | 94.7   |
| Cl-IM11                                                                                                                     | 0.25501 | -2375.11550 | 0.17922 | -2375.19130 |        |        |
| Cl-IM11 + DMA - $^3O_2$ + DFF-2<br>+ H <sub>2</sub> O - HMF-1                                                               | 0.37842 | -2587.63607 | 0.26322 | -2587.75127 | -38.0  | -6.8   |
| [V(OH)(OOH)(DMA)] <sup>+</sup> ...Cl <sup>-</sup>                                                                           | 0.16122 | -1918.60625 | 0.09441 | -1918.67306 |        |        |
| [V(OH)(OOH)(DMA)] <sup>+</sup> ...Cl <sup>-</sup> - $^3O_2$<br>+ DMA + H <sub>2</sub> O - HMF-1 + 2*DFF-2                   | 0.37341 | -2587.57933 | 0.22240 | -2587.73034 | 110.9  | 48.2   |
| Cl-IM13                                                                                                                     | 0.16420 | -1918.79928 | 0.10346 | -1918.86002 |        |        |
| Cl-IM13 + DMA - $^3O_2$ + H <sub>2</sub> O<br>+ 2*DFF-2 - HMF-1                                                             | 0.37640 | -2587.77236 | 0.23146 | -2587.91730 | -395.8 | -442.7 |
| Cl-TS7                                                                                                                      | 0.15918 | -1918.72986 | 0.09567 | -1918.79337 |        |        |
| Cl-TS7 + DMA - $^3O_2$ + H <sub>2</sub> O<br>+ 2*DFF-2 - HMF-1                                                              | 0.37138 | -2587.70294 | 0.22367 | -2587.85065 | -213.6 | -267.7 |
| Cl-IM14                                                                                                                     | 0.16471 | -1918.80434 | 0.10256 | -1918.86649 |        |        |
| Cl-IM14 + DMA - $^3O_2$ + H <sub>2</sub> O<br>+ 2*DFF-2 - HMF-1                                                             | 0.37690 | -2587.77742 | 0.23055 | -2587.92377 | -409.1 | -459.7 |
| Cl-TS6a                                                                                                                     | 0.24942 | -2375.03997 | 0.16546 | -2375.12393 |        |        |
| Cl-TS6a + DMA - $^3O_2$ + H <sub>2</sub> O<br>+ 2*DFF-2 - HMF-1                                                             | 0.37283 | -2587.56053 | 0.24946 | -2587.68390 | 160.3  | 170.1  |
| Cl-IM14a                                                                                                                    | 0.25278 | -2375.22521 | 0.16191 | -2375.31609 |        |        |
| Cl-IM14a + DMA - $^3O_2$ + H <sub>2</sub> O<br>+ 2*DFF-2 - HMF-1                                                            | 0.37619 | -2587.74577 | 0.24591 | -2587.87606 | -326.0 | -334.4 |
| [V(O) <sub>2</sub> (DMA) <sub>2</sub> ] <sup>+</sup> ...Cl <sup>-</sup>                                                     | 0.26998 | -2129.98487 | 0.18959 | -2130.06526 |        |        |
| [V(O) <sub>2</sub> (DMA) <sub>2</sub> ] <sup>+</sup> ...Cl <sup>-</sup> - $^3O_2$<br>+ 2*DFF-2 - HMF-1 + 2*H <sub>2</sub> O | 0.37493 | -2587.76151 | 0.21695 | -2587.91949 | -367.4 | -448.4 |
